# Supplementary material
Source: Springer Nature journal article supplement (https://www.springermedizin.de/resource/supplementary/12990_2005_39_MOESM3_ESM.pdf/9612496)

**A.****Untreated**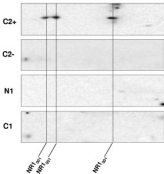**B.****Treated**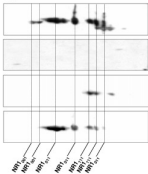

Supplement: MOESM3 [file 9612496]
